# Supplementary material for: Application of physiologically based biopharmaceutics modeling to understand the impact of dissolution differences on in vivo performance of immediate release products: The case of bisoprolol
Source: PubMed Central journal article supplement — CPT Pharmacometrics Syst Pharmacol. 2021 Jun 3;10(6):622–32. doi: 10.1002/psp4.12634 (PMC8213417; doi:10.1002/psp4.12634), 2021-06-03

**Figure S3.** Parameter sensitivity analysis for Concor® (10 mg dose) single oral administration. (a)  $C_{max}$  (b)  $AUC_{0-t}$ .

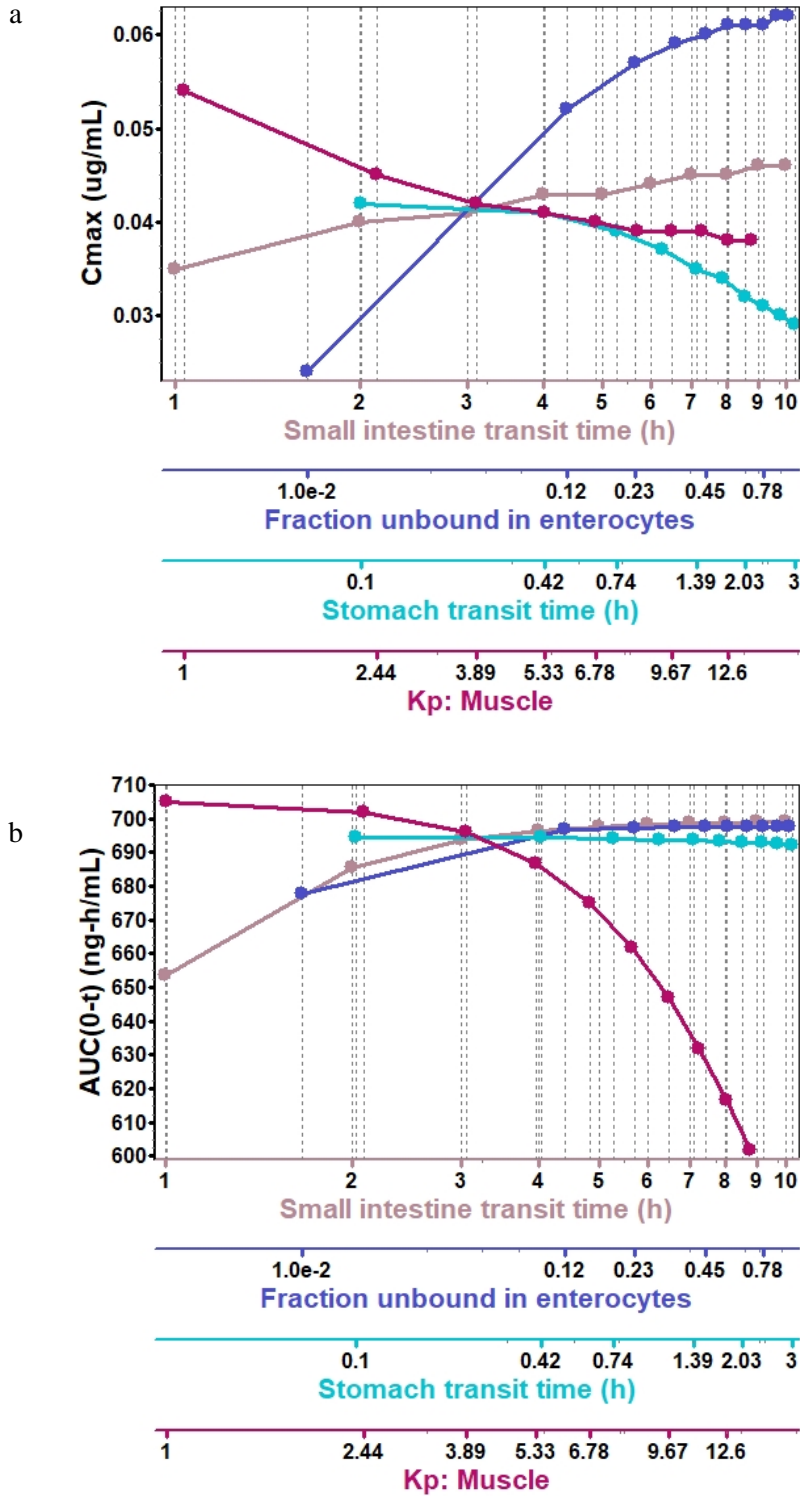

Supplement: PSP4-10-622-s002.pdf [file PSP4-10-622-s002.pdf]
