# Supplementary material for: Application of physiologically based biopharmaceutics modeling to understand the impact of dissolution differences on in vivo performance of immediate release products: The case of bisoprolol
Source: PubMed Central journal article supplement — CPT Pharmacometrics Syst Pharmacol. 2021 Jun 3;10(6):622–32. doi: 10.1002/psp4.12634 (PMC8213417; doi:10.1002/psp4.12634), 2021-06-03

**Figure S2.** Comparison of deconvolved *in vivo* and *in vitro* dissolution profiles of clinical batches of Concor® (10 mg dose): (a) Study: ALO-P8-481 (batch 5080504) (b) Study: ESO-P0-180 (batch 168614) (c) Study: CAEP 43.001.15 (batch 1110691) (d)\* Study: EMR200006-001 (batch 22648420) \* 5 mg dose.

**S2a: Study ALO-P8-481 (batch 5080504)**

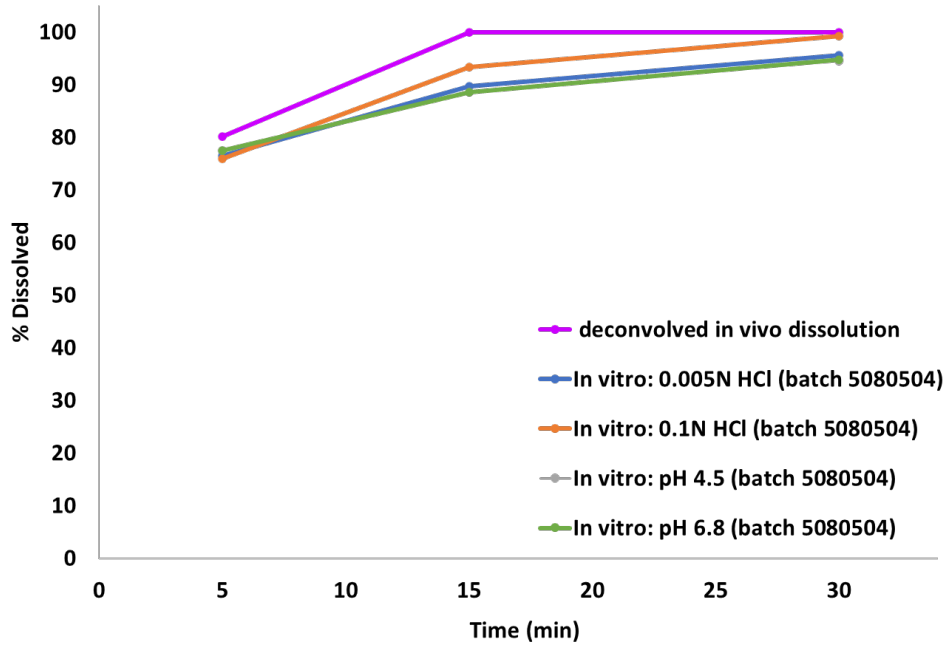

**S2b: Study ESO-P0-180 (batch 168614)**

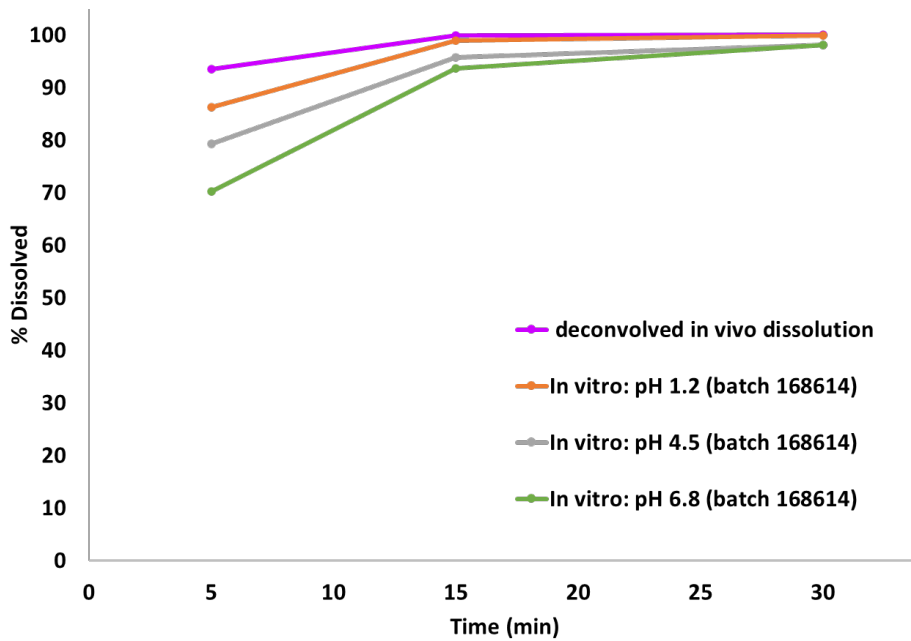

S2c: Study CAEP 43.001.15 (batch 1110691)

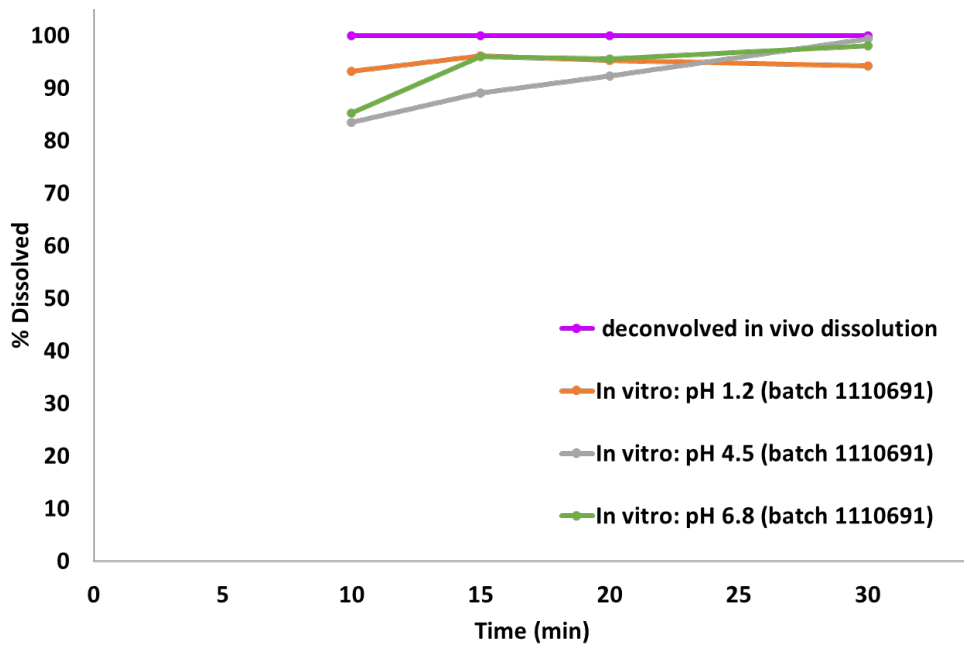

S2d: Study: EMR200006-001 (batch 22648420)

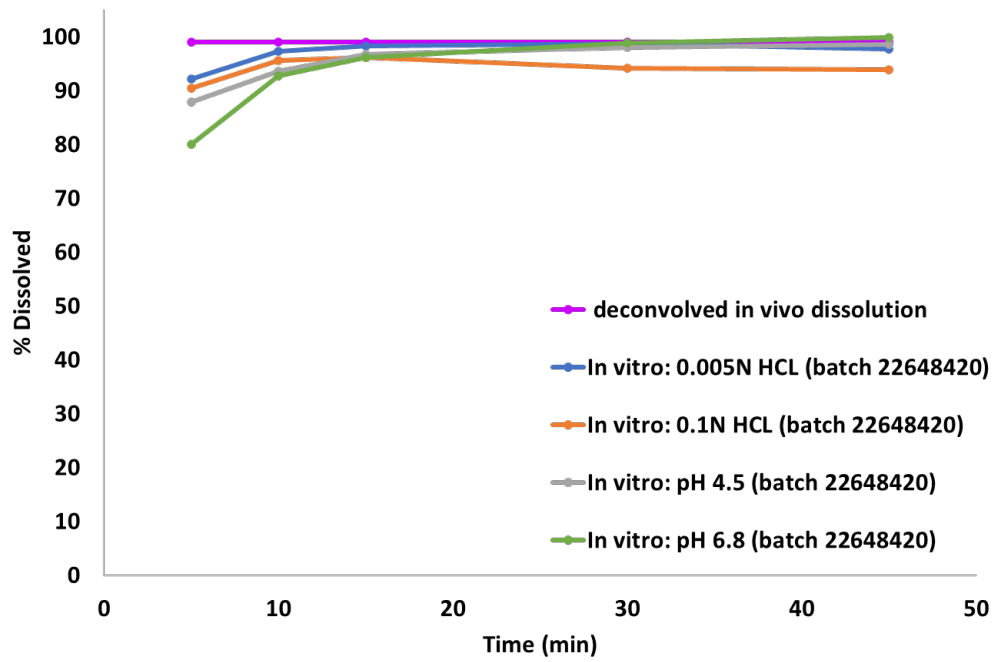

Supplement: PSP4-10-622-s005.pdf [file PSP4-10-622-s005.pdf]
