# Supplementary material for: Application of physiologically based biopharmaceutics modeling to understand the impact of dissolution differences on in vivo performance of immediate release products: The case of bisoprolol
Source: PubMed Central journal article supplement — CPT Pharmacometrics Syst Pharmacol. 2021 Jun 3;10(6):622–32. doi: 10.1002/psp4.12634 (PMC8213417; doi:10.1002/psp4.12634), 2021-06-03

**Figure S4.** Comparison of *in vitro* dissolution profiles of different slow and fast dissolving batches of Concor® (10 mg dose) at pH 6.8.

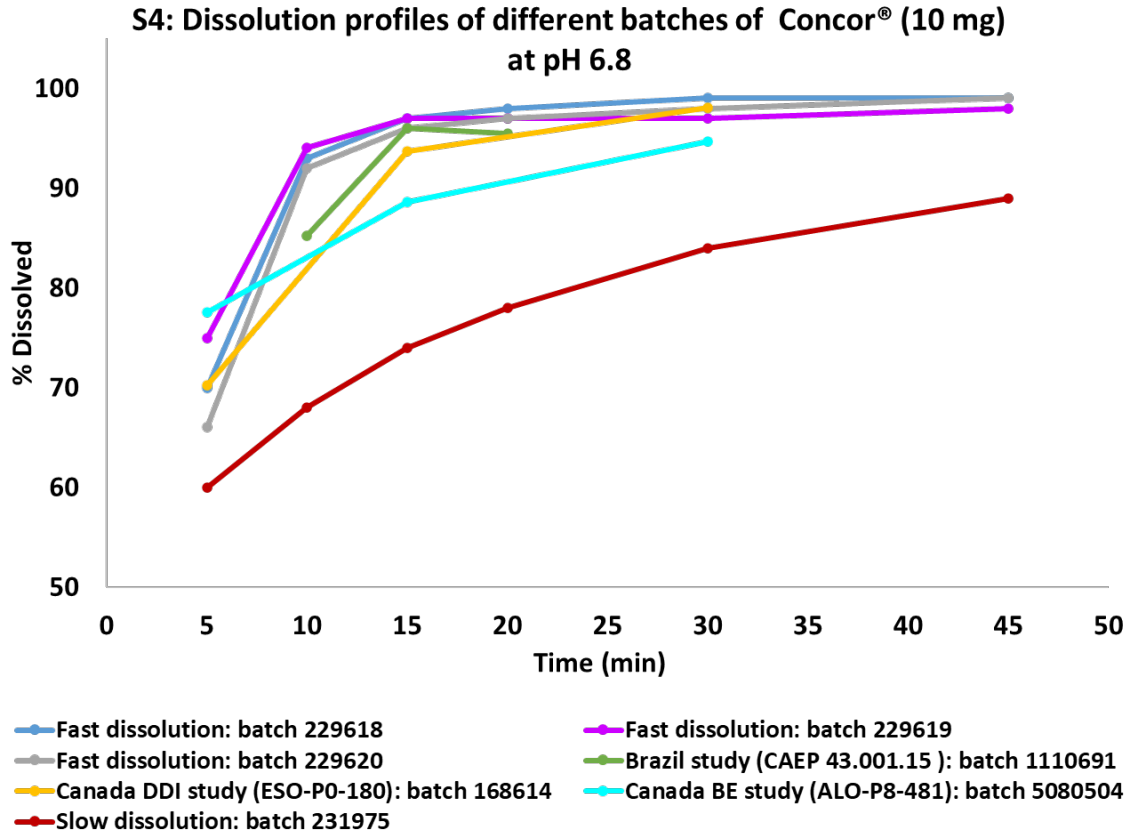

Supplement: PSP4-10-622-s008.pdf [file PSP4-10-622-s008.pdf]
