# Supplementary figures and images for: Application of physiologically based biopharmaceutics modeling to understand the impact of dissolution differences on in vivo performance of immediate release products: The case of bisoprolol
Source: PubMed Central journal article supplement — CPT Pharmacometrics Syst Pharmacol. 2021 Jun 3;10(6):622–32. doi: 10.1002/psp4.12634 (PMC8213417; doi:10.1002/psp4.12634), 2021-06-03

**Figure S1.** The proposed workflow of applying PBBM modeling and simulation for this study.

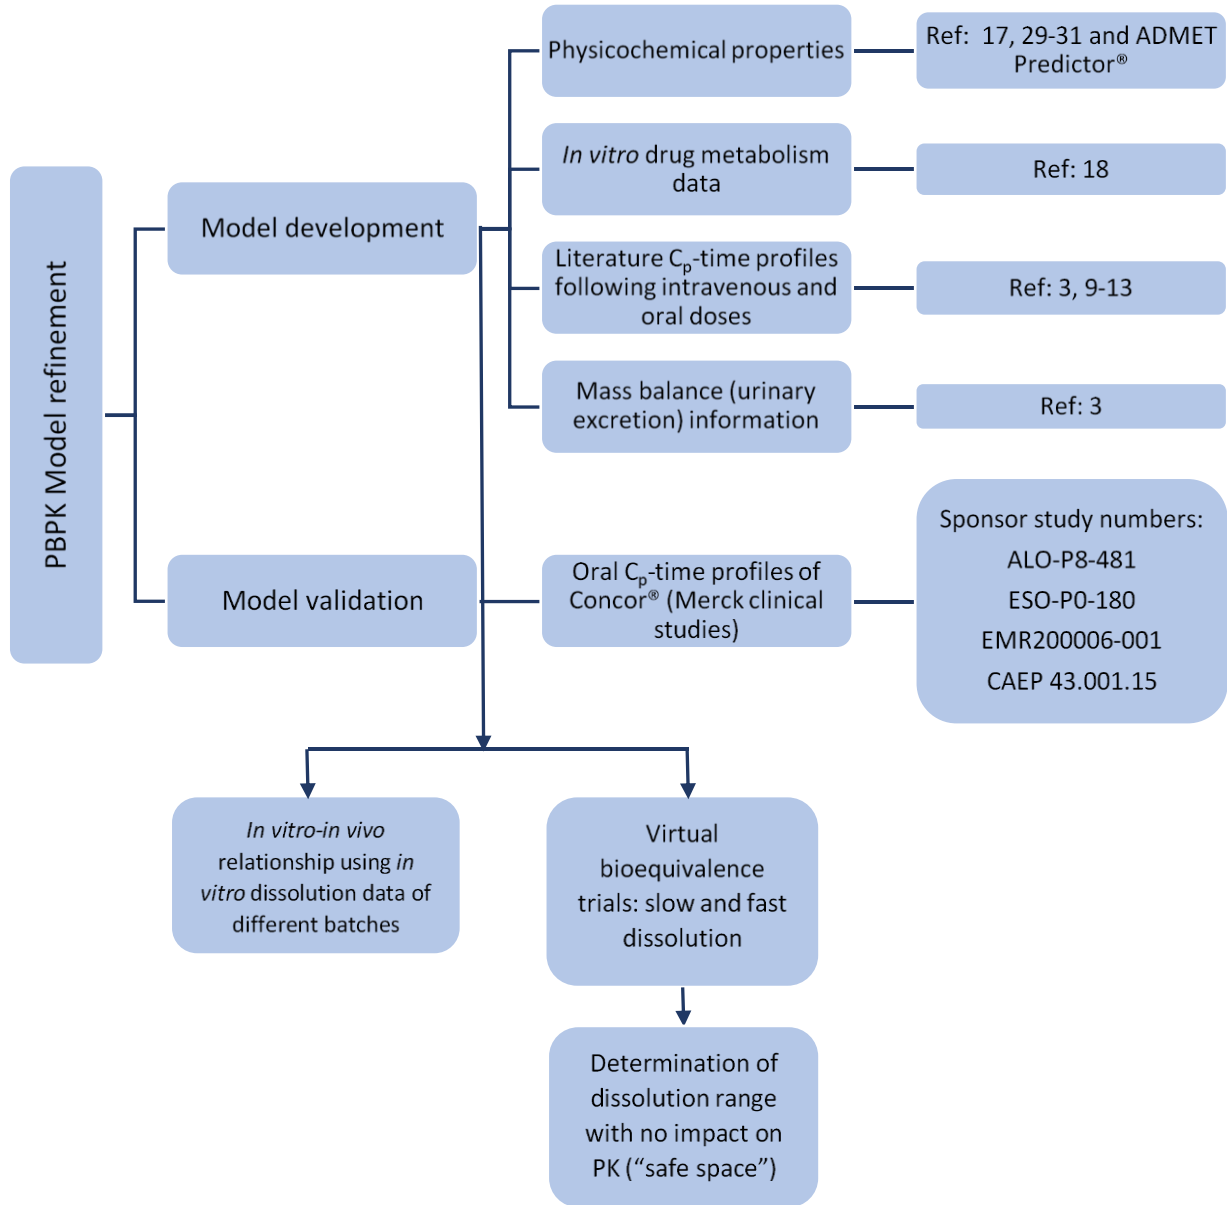

Supplement: PSP4-10-622-s001.pdf [file PSP4-10-622-s001.pdf]
